# Supplementary material
Source: HighWire-hosted journal article supplement (https://openres.ersjournals.com/content/8/1/00375-2021)
Supplement: inline-supplementary-material-8 [file inline-supplementary-material-8.xlsx]

## Sheet: Variants-Genes
Table S3. Shared variants between LAM and cancer or pulmonary function, and candidate pleiotropic genes.
SNP ID	Chromosome	Position (bp, hg19)	Reference	Alternative	Locus gene(s)	GTEx pan-tissue	GTEx eQTL nominal (blood vessel, lung, kidney, and uterus)	GWAS Catalog	4C lung interactions and eQTL evidence (underlined)	LAMcore (Guo et al.)	LAM vs mesenchymal (Guo et al.)	LAM (Obraztsova et al.)
rs11240341	1	205015284	T	C	CNTN2	CNTN2, DSTYK, NUAK2, RBBP5, RP11-383G10.5, RP11-536L3.4, TMCC2, TMEM81	NA	Mean platelet volume, https://www.ebi.ac.uk/gwas/publications/27863252; Schizophrenia, https://www.ebi.ac.uk/gwas/studies/GCST004946	CNTN2, DSTYK, NUAK2, TMCC2, TMEM81	No	No	No
rs16937	1	205035455	A	G	CNTN2	CNTN2, DSTYK, NUAK2, RBBP5, RP11-383G10.5, RP11-536L3.4, TMCC2, TMEM81	NA	Mean platelet volume, https://www.ebi.ac.uk/gwas/publications/27863252; Schizophrenia, https://www.ebi.ac.uk/gwas/studies/GCST004946	CNTN2, DSTYK, NUAK2, TMCC2, TMEM81	No	No	No
rs13410076	2	46815961	C	T	PIGF	ATP6V1E2, CRIPT, PIGF	ATP6V1E2 (aorta, coronary, lymphocytes, tibial, uterus), CRIPT (aorta, tibial), PIGF (all)	NA	PRKCE, EPAS1, TMEM247, ATP6V1E2, RHOQ, CRIPT, SOCS5, MCFD2, TTC7A, C2orf6,	No	CRIPT	No
rs4668267	2	171360896	C	T	MYO3B	GAD1, LINC01124, SP5	GAD1 (coronary, tibial)	Lobe attachment; http://www.ebi.ac.uk/efo/EFO_0007667	GAD1, MYO3B, UBR3, GORASP2	SP5	SP5	No
rs17036640	4	158605184	G	A	GRIA2 (> 300 kb), FAM198B (> 300 kb)	RP11-364P22.2	FAM198B (aorta)	NA	GRIA2, GASK1B/FAM198B, TMEM144	No	No	No
rs4512050	4	158597491	G	A	GRIA2 (> 300 kb), FAM198B (> 300 kb)	RP11-364P22.2	FAM198B (aorta)	NA		No	No	No
rs7701443	5	142792650	G	A	NR3C1	NR3C1	NR3C1 (aorta)	NA	NR3C1, ARHGAP26, HMHB1	No	No	No
rs835069	5	14984116	T	C	ANKH (> 200 kb)	NA	NA	NA	ANKH, FAM105B/OTULIN, TRIO, FBXL7	No	No	No
rs3861451	6	148320047	C	T	SAMD5 (> 500 kb), SASH1 (> 200 kb)	SAMD5	SAMD5 (coronary, lung, tibial)	NA	SASH1	No	No	No
rs9648555	7	46656869	G	A	LOC730338, IGFBP3 (> 500 kb), TNS3 (> 500 kb)	NA	NA	NA		No	No	IGFBP3
rs2537572	7	17771780	G	A	SNX13	RP11-511H23.2	RP11-511H23.2 (kidney)	NA	SNX13, HDAC9, AHR	No	No	No
rs12542425	8	117642345	T	C	EIF3H, UTP23	UTP23	NA	NA	SLC30A8	No	No	No
rs34672734	8	117805281	G	A	UTP23, RAD21	SLC30A8, UTP23	RAD21 (aorta)	NA	EIF3H, SLC30A8, LINC00536	No	No	No
rs17663673	8	117650006	C	T	EIF3H	UTP23	EIF3H (aorta, lymphocytes), UTP23 (aorta, lung, tibial)	NA	EIF3H, SLC30A8, LINC00536	No	No	No
rs7839361	8	117645687	C	T	EIF3H	NA	NA	NA		No	No	No
rs2511654	8	117623003	C	T	EIF3H	NA	NA	NA		No	No	No
rs2146084	9	112505617	A	G	PALM2	PALM2	PALM2 (tibial)	NA	PALM2, TXN, PTPN3	No	No	No
rs4961722	9	16529174	C	T	BNC2	NA	BNC2 (uterus)	NA	BNC2, C9orf92	BNC2	No	No
rs10901587	10	128001759	T	C	ADAM12	ADAM12	ADAM12 (uterus)	NA	ADAM12, C10orf90	ADAM12	No	No
rs10859942	12	96161207	C	T	NTN4	AMDHD1, HAL, NTN4, RP11-536G4.2, SNRPF; sQTL: CCDC38, NTN4	AMDHD1 (lung), NTN4 (artery tibial, uterus), SNRPF (artery tibial)	NA	METAP2	No	No	No
rs7959413	12	96147836	C	T	NTN4	HAL, SNRPF, RP11-536G4.2	SNRPF (artery tibial)		NTN4, SNRPF	No	No (SNRP genes included)	No (SNRP genes included)
rs9528802	13	65235556	C	T	PCDH9 (> 1 Mb)	NA	NA	NA		No	No	No
rs8025061	15	96176965	G	A	NR2F2 (> 500 kb)	NA	NR2F2 (aorta)	NA		NR2F2	No	No
rs16975446	15	96177806	A	G	NR2F2 (> 500 kb)	NA	NR2F2 (aorta)	NA		NR2F2	No	No
rs16975396	15	96158705	G	T	NR2F2 (> 500 kb)	NA	NA	NA		NR2F2	No	No
rs8036214	15	96145329	C	T	NR2F2 (> 500 kb)	NA	NA	NA		NR2F2	No	No
rs3996842	15	96178859	T	C	NR2F2 (>500kb)	NA	NR2F2 (aorta)	NA		NR2F2	No	No
rs59125351	15	96144157	G	T	NR2F2 (> 500 kb)	NA	NA	NA		NR2F2	No	No
rs4815366	20	25049909	G	T	ACSS1, VSX1	ABHD12, ACSS1, FAM182A, PYGB, RP4-738P15.1, RP5-1025A1.3, RP5-965G21.4, VSX1	ABHD12 (aorta, coronary, lung, tibial), ACSS1 (coronary, lymphocytes, kidney), FAM182A (lung, uterus), RP5-965G21.4 (aorta, lymphocytes, tibial), VSX1 (uterus)	NA	ABHD12, GINS1, NINL, ENTPD6, PYGB, APMAP, CST7, LOC284798, ACSS1, FAM182A, PYGB, VSX1, SYNDIG1	No	No	No
