# Supplementary material
Source: HighWire-hosted journal article supplement (https://openres.ersjournals.com/content/8/1/00375-2021)
Supplement: inline-supplementary-material-11 [file inline-supplementary-material-11.xlsx]

## Sheet: NR3C1 interactors - lung funct
Table S6. Gene candidates linked to lung function (Shrine et al., Nat Genet 2019) and coding for NR3C1 interactors.
Candidate gene name	Gene title	PubMed NR3C1 interaction
ALX1	ALX homeobox 1	https://pubmed.ncbi.nlm.nih.gov/31182584/
AP3B1	Adaptor related protein complex 3 beta 1 subunit	https://pubmed.ncbi.nlm.nih.gov/31182584/
CAMK2G	Calcium/calmodulin dependent protein kinase II gamma	https://pubmed.ncbi.nlm.nih.gov/31182584/
ELAVL2	ELAV like RNA binding protein 2	https://pubmed.ncbi.nlm.nih.gov/31182584/
FKBP4	FK506 binding protein 4	https://pubmed.ncbi.nlm.nih.gov/8341706/
JMJD1C	Jumonji domain containing 1C	https://pubmed.ncbi.nlm.nih.gov/28611094/
KIAA1462	Junctional cadherin 5 associated	https://pubmed.ncbi.nlm.nih.gov/31182584/
LMOD1	Leiomodin 1	https://pubmed.ncbi.nlm.nih.gov/31182584/
MTCL1	Microtubule crosslinking factor 1	https://pubmed.ncbi.nlm.nih.gov/31182584/
NCOR1	Nuclear receptor corepressor 1	https://pubmed.ncbi.nlm.nih.gov/12011091/
OTUD4	OTU deubiquitinase 4	https://pubmed.ncbi.nlm.nih.gov/31182584/
PITPNM3	PITPNM family member 3	https://pubmed.ncbi.nlm.nih.gov/31182584/
SATB2	SATB homeobox 2	https://pubmed.ncbi.nlm.nih.gov/31182584/
SMARCA2	SWI/SNF related, matrix associated, actin dependent regulator of chromatin, subfamily A, member 2	https://pubmed.ncbi.nlm.nih.gov/17043312/
TRIP11	Thyroid hormone receptor interactor 11	https://pubmed.ncbi.nlm.nih.gov/31182584/
ZFP82	ZFP82 zinc finger protein	https://pubmed.ncbi.nlm.nih.gov/31182584/
