# Supplementary material
Source: HighWire-hosted journal article supplement (https://openres.ersjournals.com/content/8/1/00375-2021)

Figure S2

FEV<sub>1</sub>

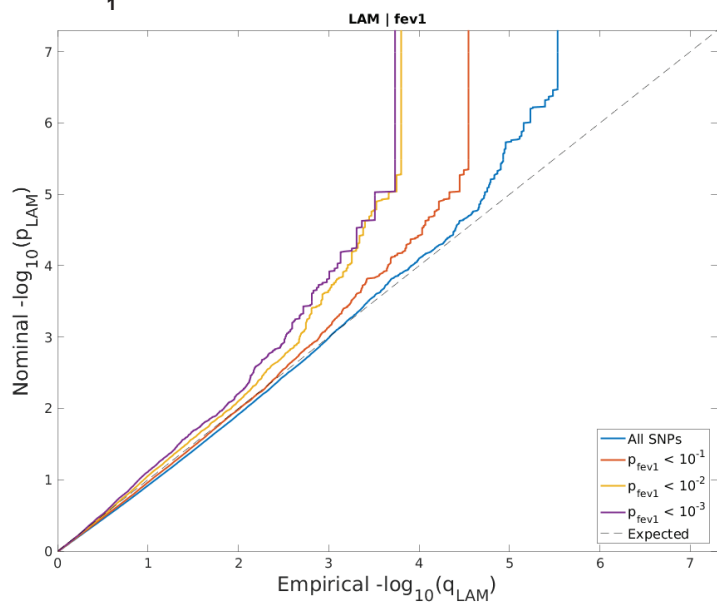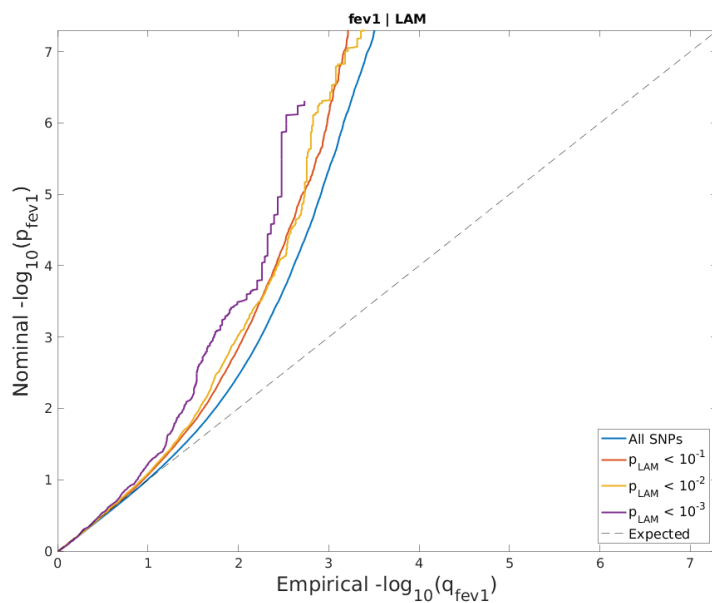

FVC

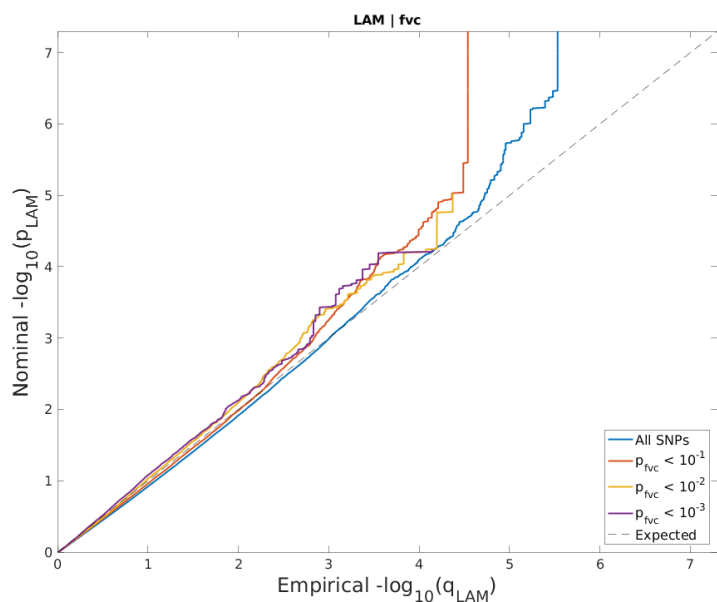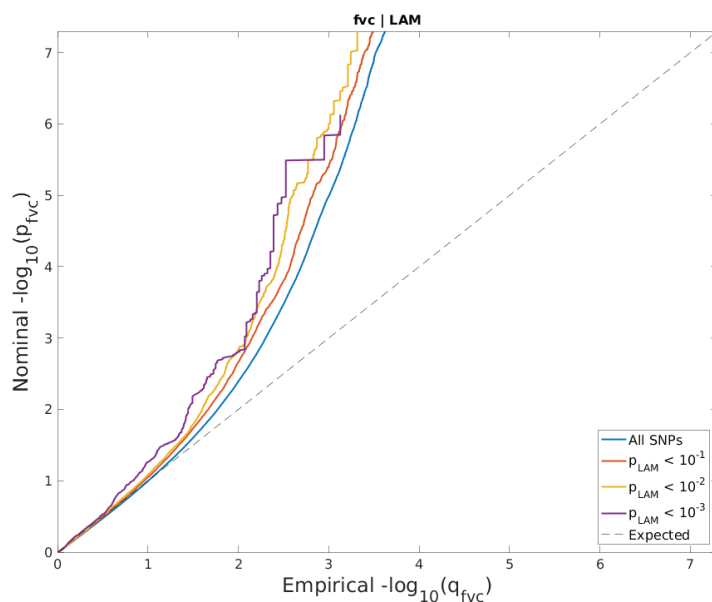

FEV<sub>1</sub>/FVC

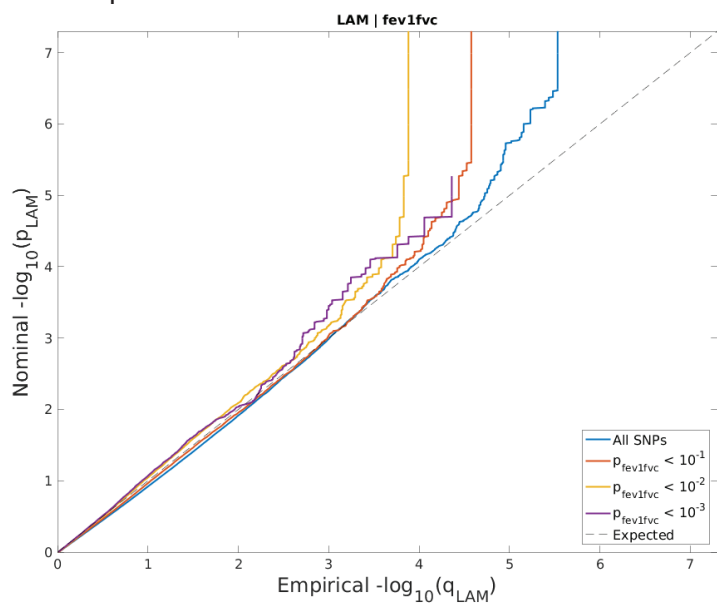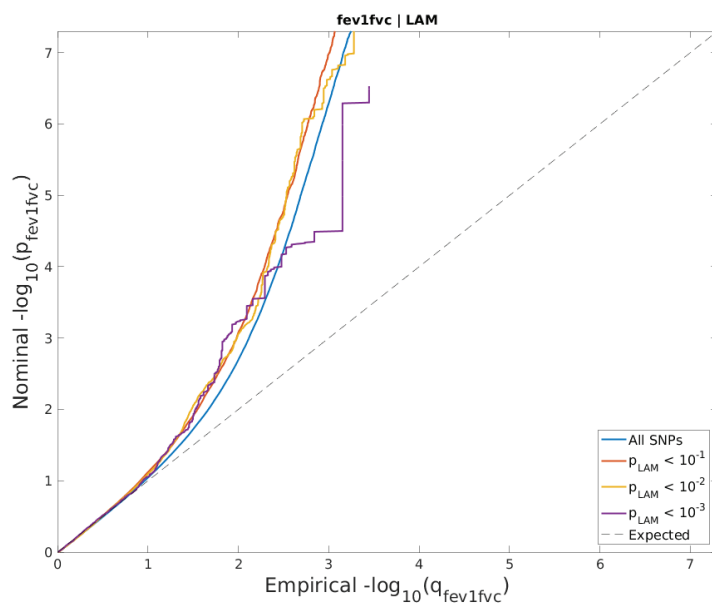

Supplement: inline-supplementary-material-2 [file inline-supplementary-material-2.pdf]
